# Supplementary material for: Technical note: Quantified organic aerosol subsaturated hygroscopicity by a simple optical scatter monitor system through field measurements
Source: Copernicus journal article supplement (doi:10.5194/acp-24-13445-2024), 2024-12-05
Supplement: Supplementary file 1 [file acp-24-13445-2024-supplement.pdf]

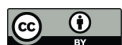

*Supplement of*

**Technical note: Quantified organic aerosol subsaturated hygroscopicity by a simple optical scatter monitor system through field measurements**

**Jie Zhang et al.**

*Correspondence to:* Jie Zhang (jzhang35@albany.edu)

The copyright of individual parts of the supplement might differ from the article licence.

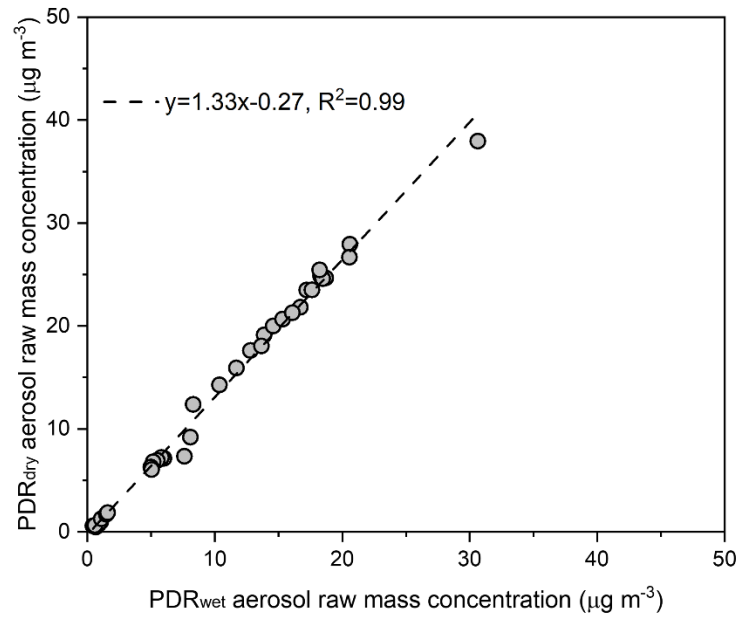

**Figure S1.** The head-to-head-correlation scatterplot between the two pDRs under the lowest relative humidity conditions reported by PDR<sub>wet</sub> (RH < 45%)

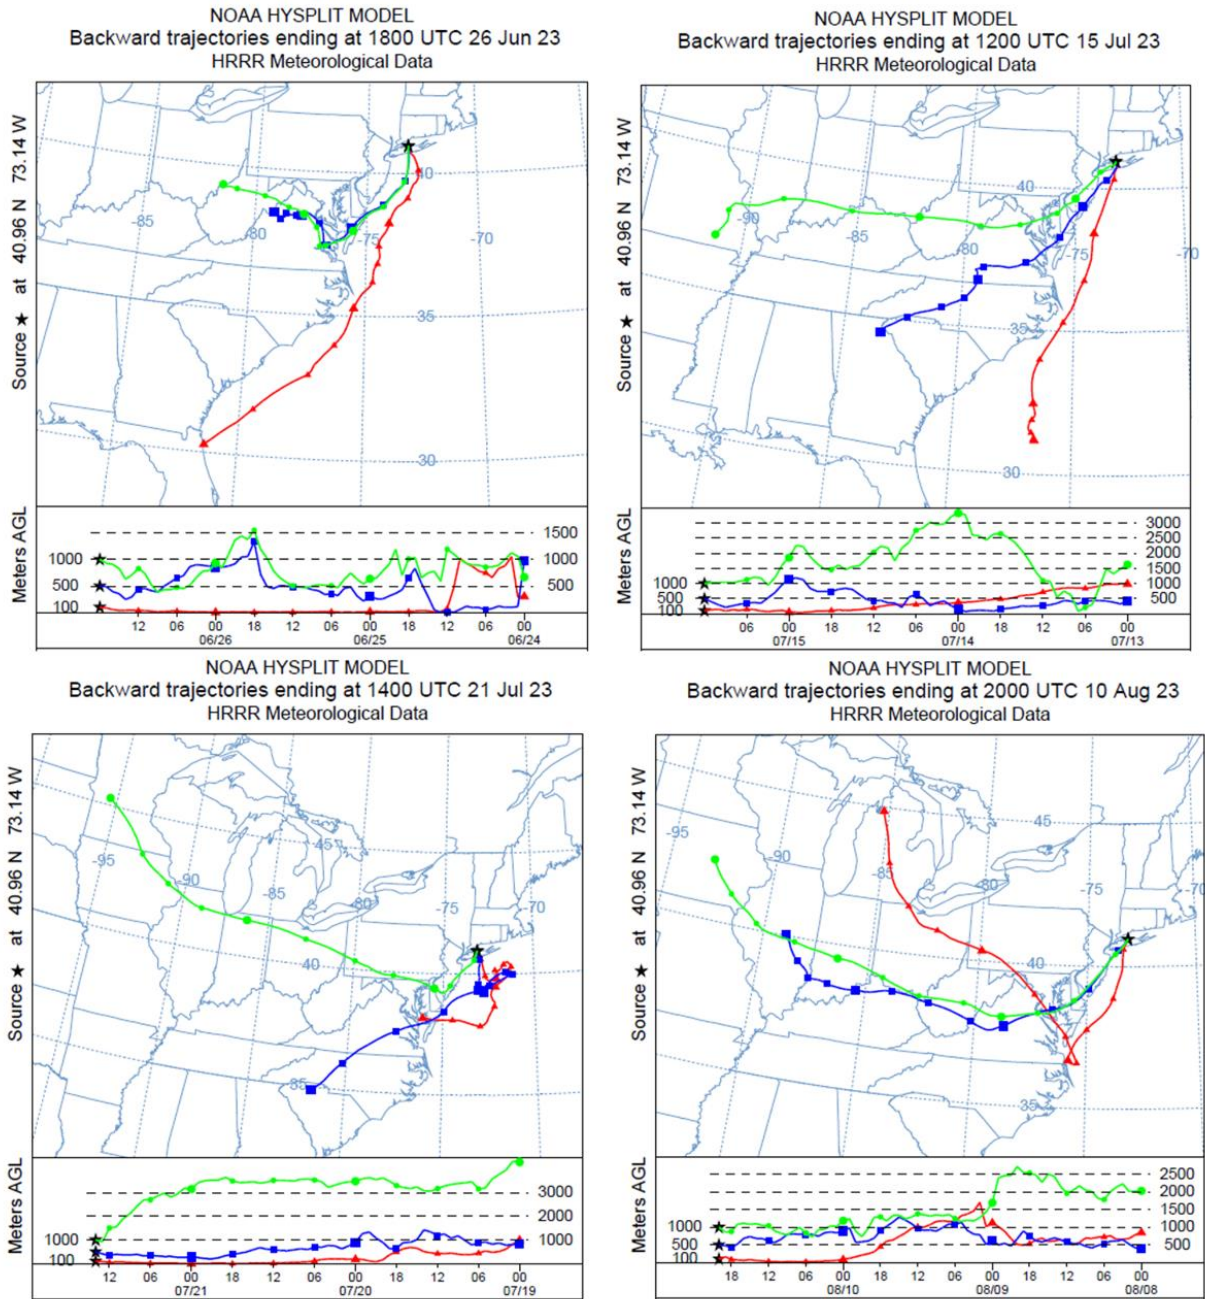

**Figure S2.** The representative back trajectories of each subperiod (P1, P3, P5, and P9) of Group1(urban) with aerosol having urban sources

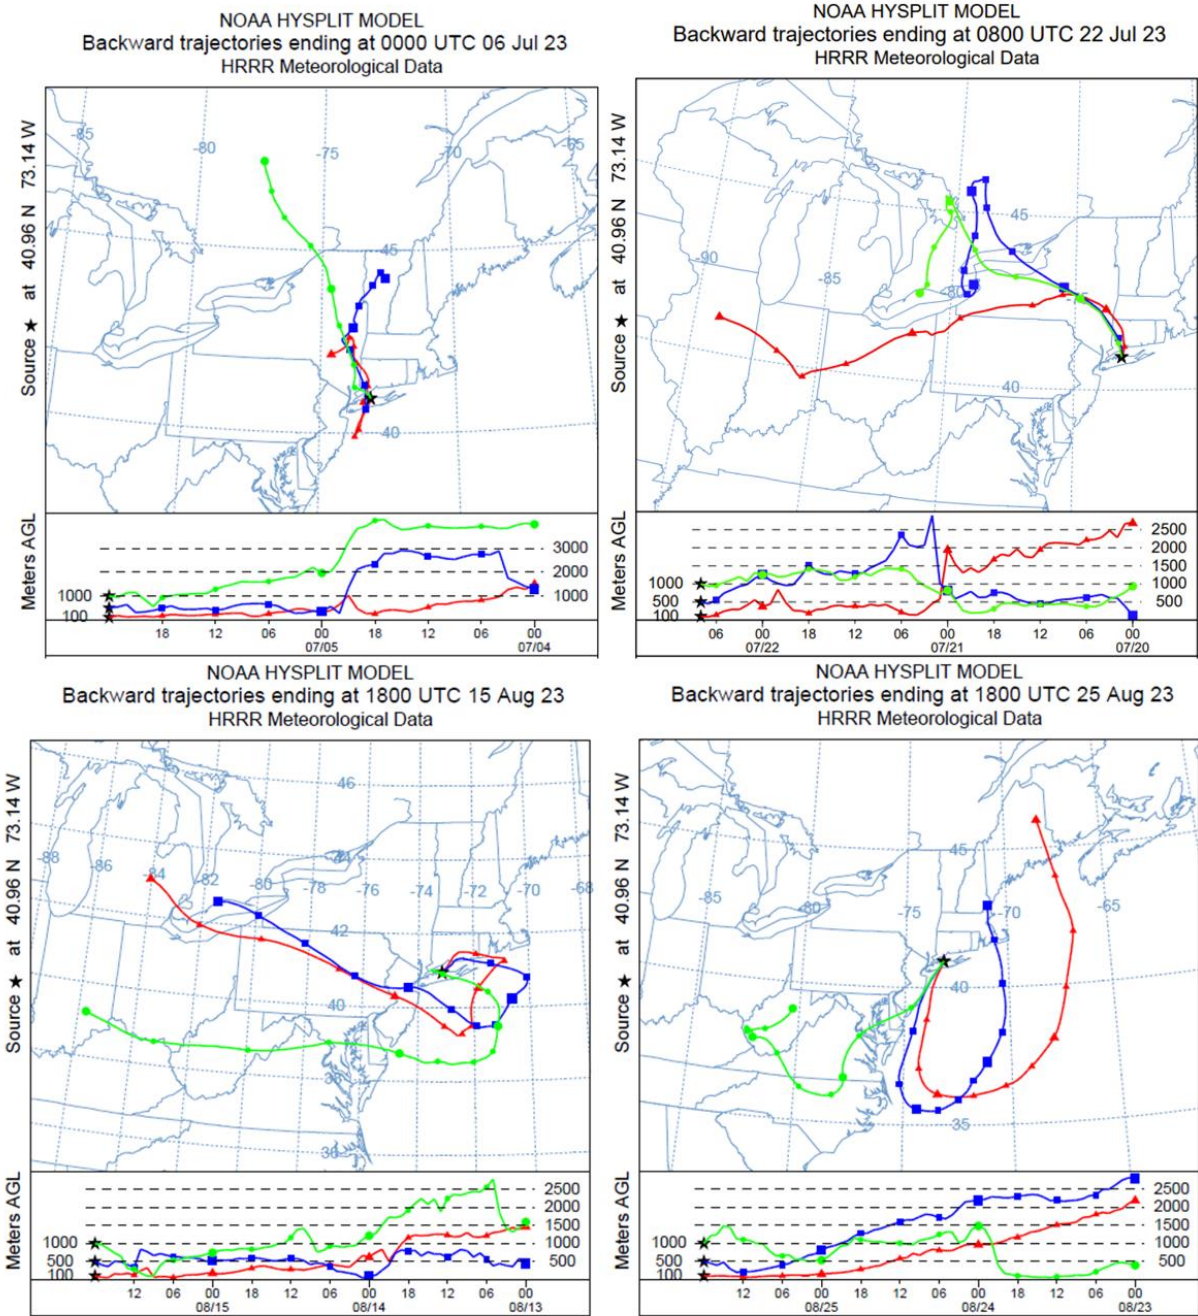

**Figure S3.** The representative back trajectories of each subperiod (P2, P6, P10, P11) of Group2(rural) with aerosol having rural sources



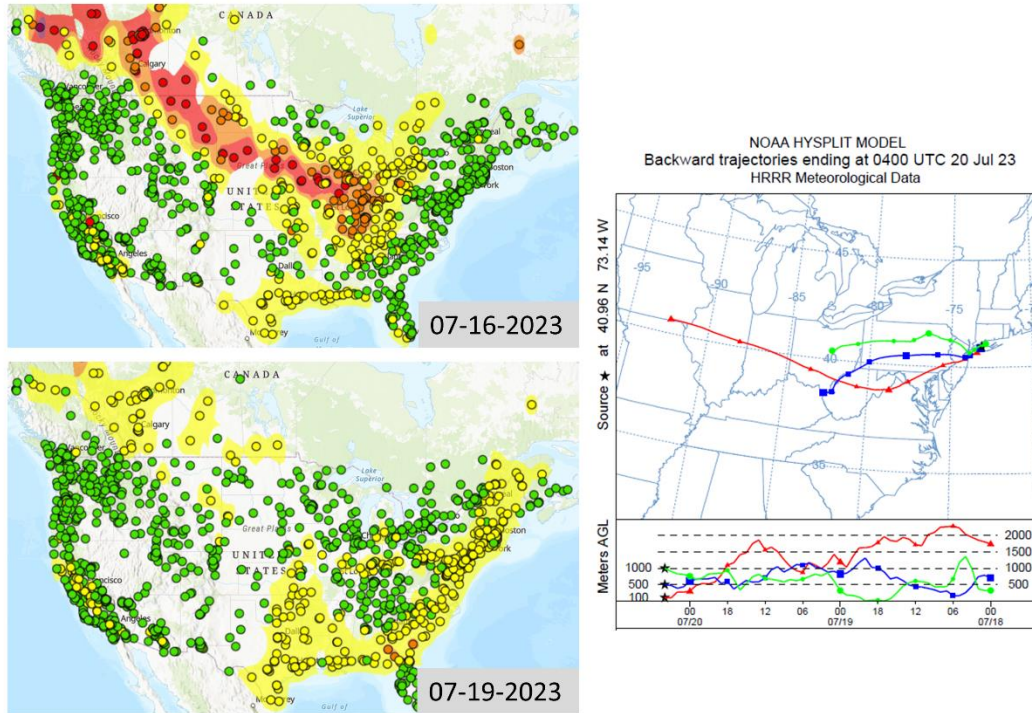

**Figure S4.** The representative back trajectory on July 19 of P4 of Group3(wildfire) when aerosol affected by the wildfire plumes, with the PM<sub>2.5</sub> AQI distribution map on July 19 verifying the wildfire plumes influence and on the previous date (July 16) showing the place of original wildfire and its transport.

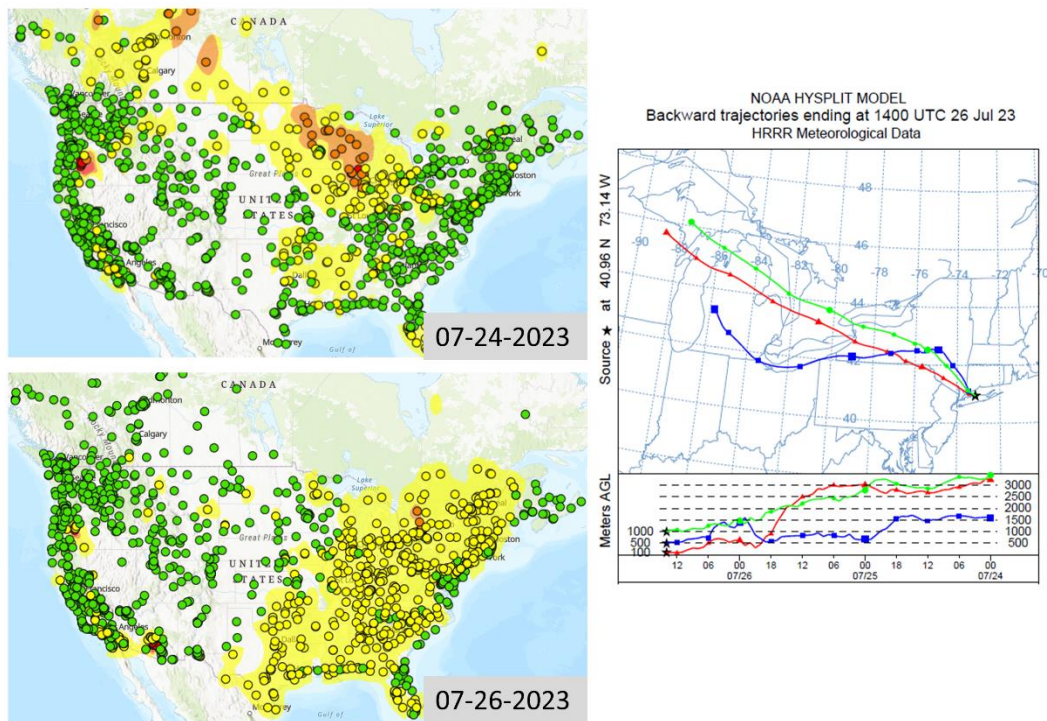

**Figure S5.** The representative back trajectory on July 26 of P7 of Group3(wildfire) when aerosol affected by the wildfire plumes, with the PM<sub>2.5</sub> AQI distribution map on July 26 verifying the wildfire plumes influence and on the previous date (July 24) showing the place of original wildfire and its transport.

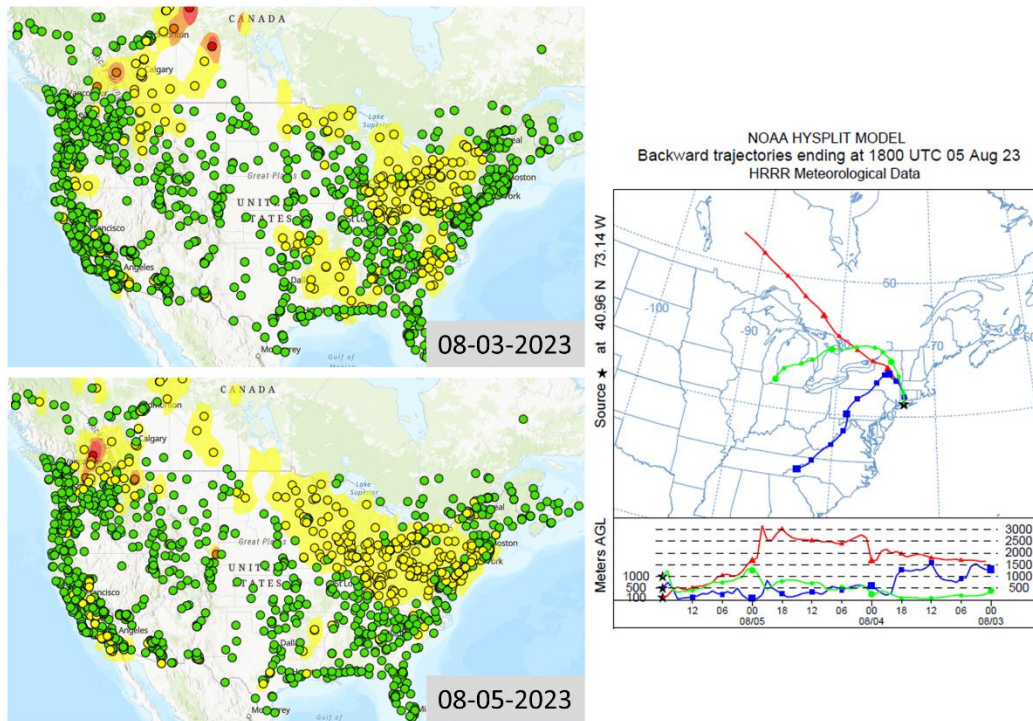

**Figure S6.** The representative back trajectory on Aug. 05 of P8 of Group3(wildfire) with aerosol affected by the wildfire plumes, with the PM<sub>2.5</sub> AQI distribution map on Aug. 05 verifying the wildfire plumes influence and on the previous date (Aug. 03) showing the place of original wildfire and its transport.



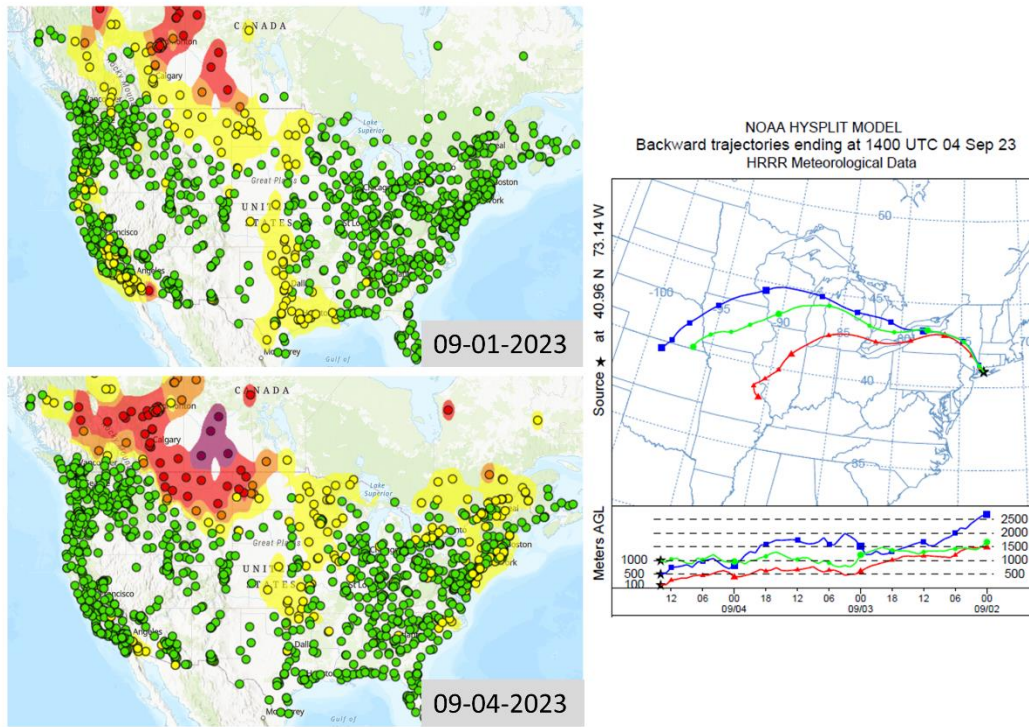

**Figure S7.** The representative back trajectory on Sep. 04 of P12 of Group3(wildfire) group with aerosol affected by the wildfire plumes, with the  $PM_{2.5}$  AQI distribution map on Sep. 04 verifying the wildfire plumes influence and on the previous date (Sep. 04) showing the place of original wildfire and its transport.



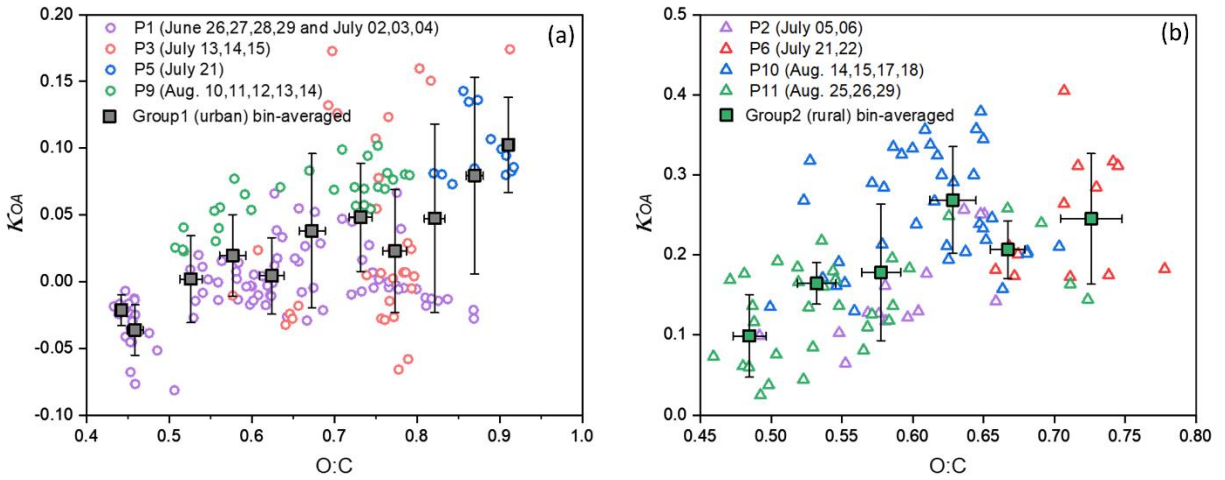

**Figure S8.** (a) The relationship between bin-averaged  $\kappa_{OA}$  and O:C for Group1(urban) with the urban aerosol sources (in grey squares with their standard deviation as error bar), and the relationship between  $\kappa_{OA}$  and O:C of each subperiod of Group1(urban) with a time resolution of 1-hr. (b) The relationship between bin-averaged  $\kappa_{OA}$  and O:C for Group2(rural) with the rural aerosol sources (in green squares with their standard deviation as error bar), and the relationship between  $\kappa_{OA}$  and O:C of each subperiod of Group2(rural) with a time resolution of 1-hr.
